# Supplementary material for: Inhibition effects of activated carbon particles on gas hydrate formation at oil–water interfaces
Source: Royal Society of Chemistry journal article supplement (doi:10.1039/c5ra08335d), 2015-01-01
Supplement: c5ra08335d1.pdf [file c5ra08335d1.pdf]

## Electronic Supplementary Information

# Inhibition Effects of Activated Carbon Particles on Gas Hydrate Formation at Oil – Water Interfaces

*Seungjun Baek<sup>1</sup>, Juwon Min<sup>1</sup>, Jae W. Lee <sup>\*1</sup>*

<sup>1</sup>Department of Chemical and Biomolecular Engineering , Korea Advanced Institute of Science and Technology (KAIST), 291 Daehak-ro, Yuseong-gu, Daejeon 305-701, Republic of Korea

Corresponding Author

\*Prof. Jae W. Lee

Tel.: +82-42-350-3940. Fax: +82-42-350-3910. E-mail: [jaewlee@kaist.ac.kr](mailto:jaewlee@kaist.ac.kr)

Address: Department of Chemical and Biomolecular Engineering, Korea Advanced Institute of Science and Technology (KAIST), 291 Daehak-ro, Yuseong-gu, Daejeon 305-701, Republic of Korea.

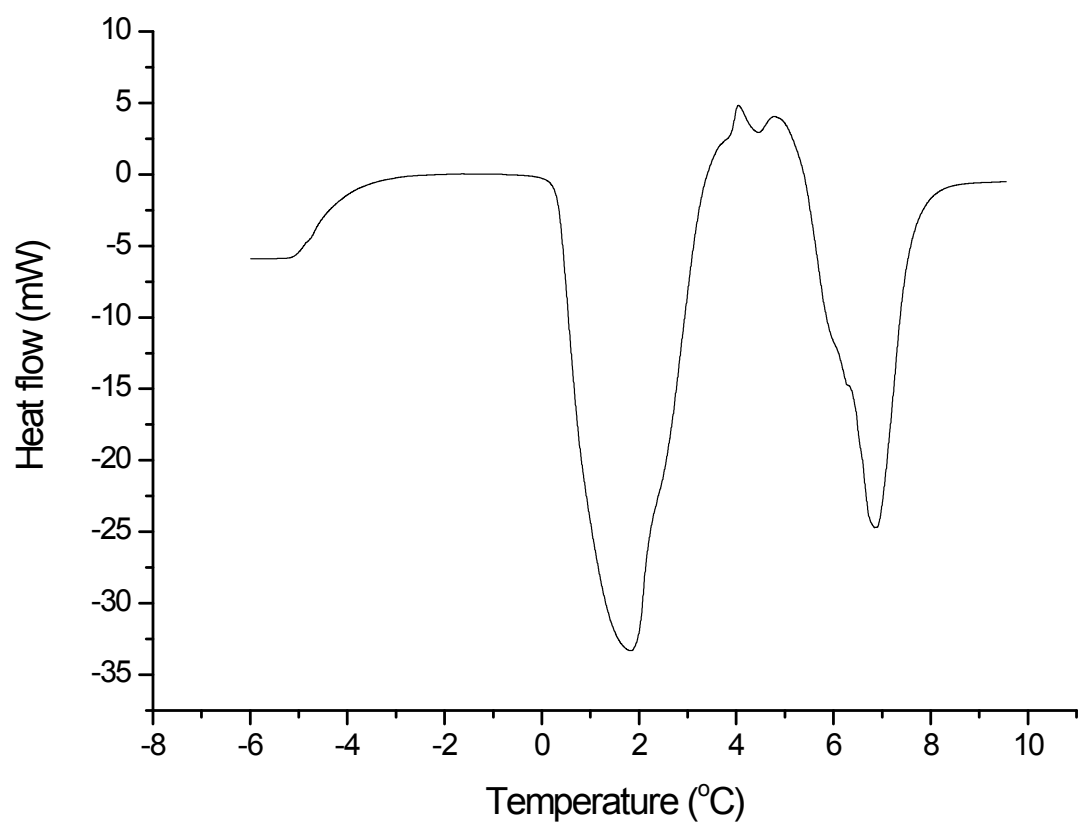

**Fig. S1.** DSC thermograph on dissociation of ice and cyclopentane-propane mixed hydrate without activated carbon particles.

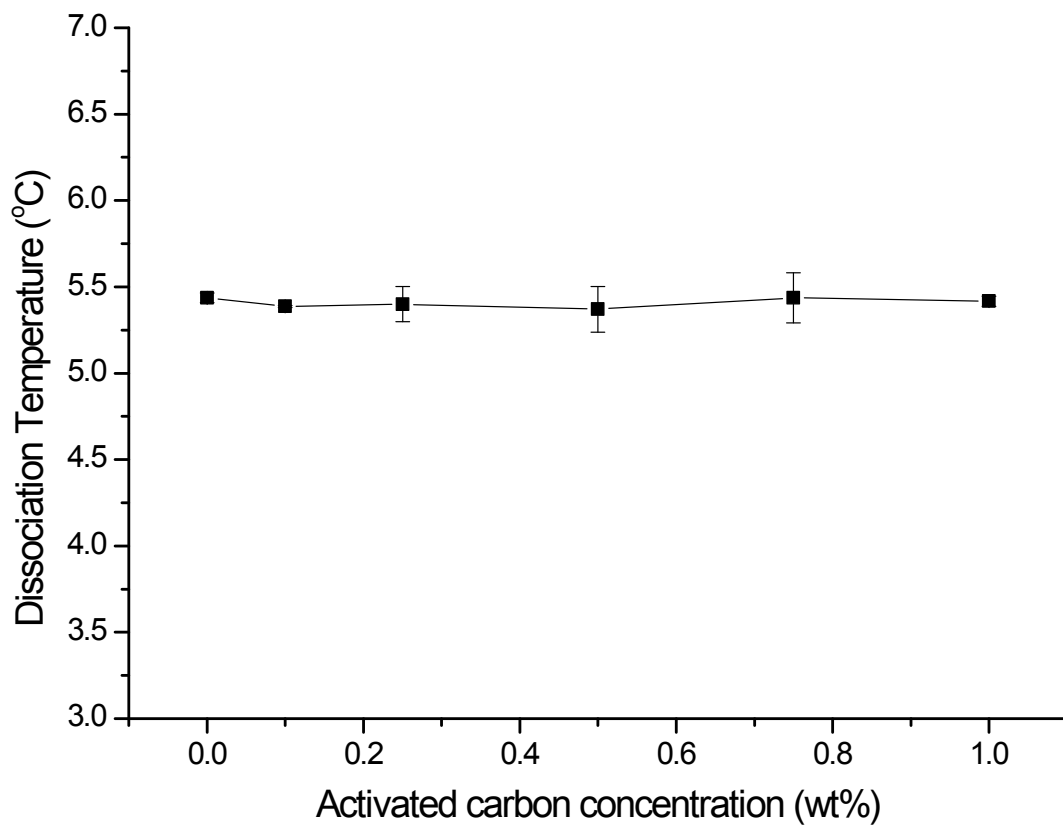

**Fig. S2.** Dissociation temperature of cyclopentane and propane mixed hydrate for various concentration of activated carbon particles.
